# Supplementary material for: Hijacking Sexual Immuno-Privilege in GBM—An Immuno-Evasion Strategy
Source: MDPI journal article supplement (doi:10.3390/ijms222010983), 2021-10-12
Supplement: s1 [file s1]

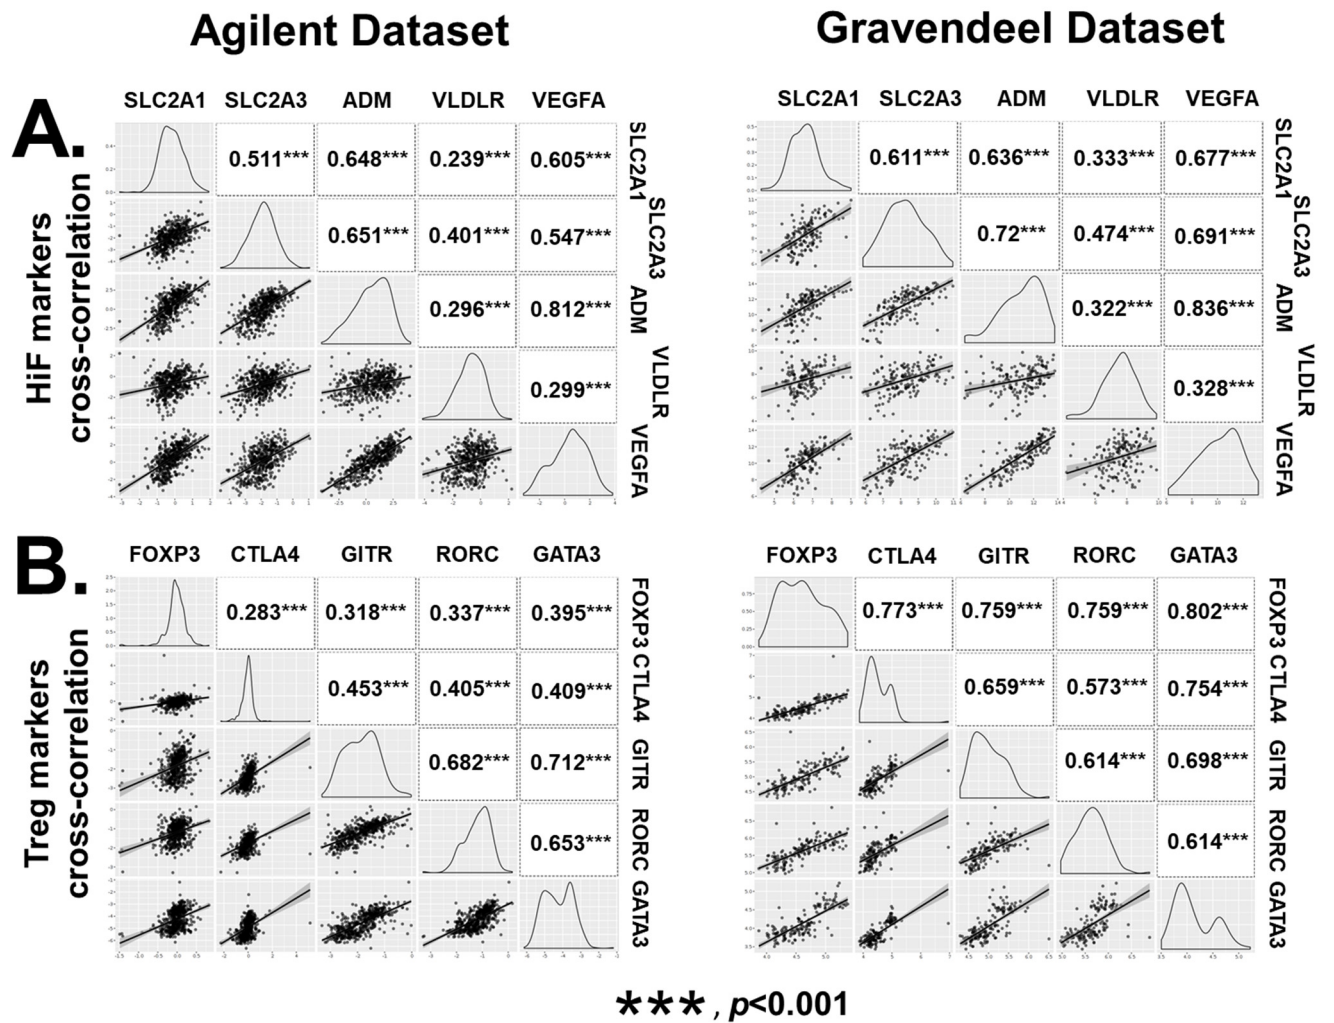

**Figure S1. Cross-Correlation of Selected Hypoxia Response Genes (HiF) and RORC-Treg Genes in GBM:** The cross-correlations of *SLC2A1*, *SLC2A3*, *ADM*, *VLDLR* and *VEGFA* (**Figure S1A.**) with *FOXP3*, *CTLA4*, *GITR*, *RORC* and *GATA3* (**Figure S1B.**) Transcription levels of wild-type IDH GBM tumors, drawn from Agilent, on the left, and Gravendeel, on the right, databases.  $p < 0.001$  in all cases. Images generated using Gliovis.

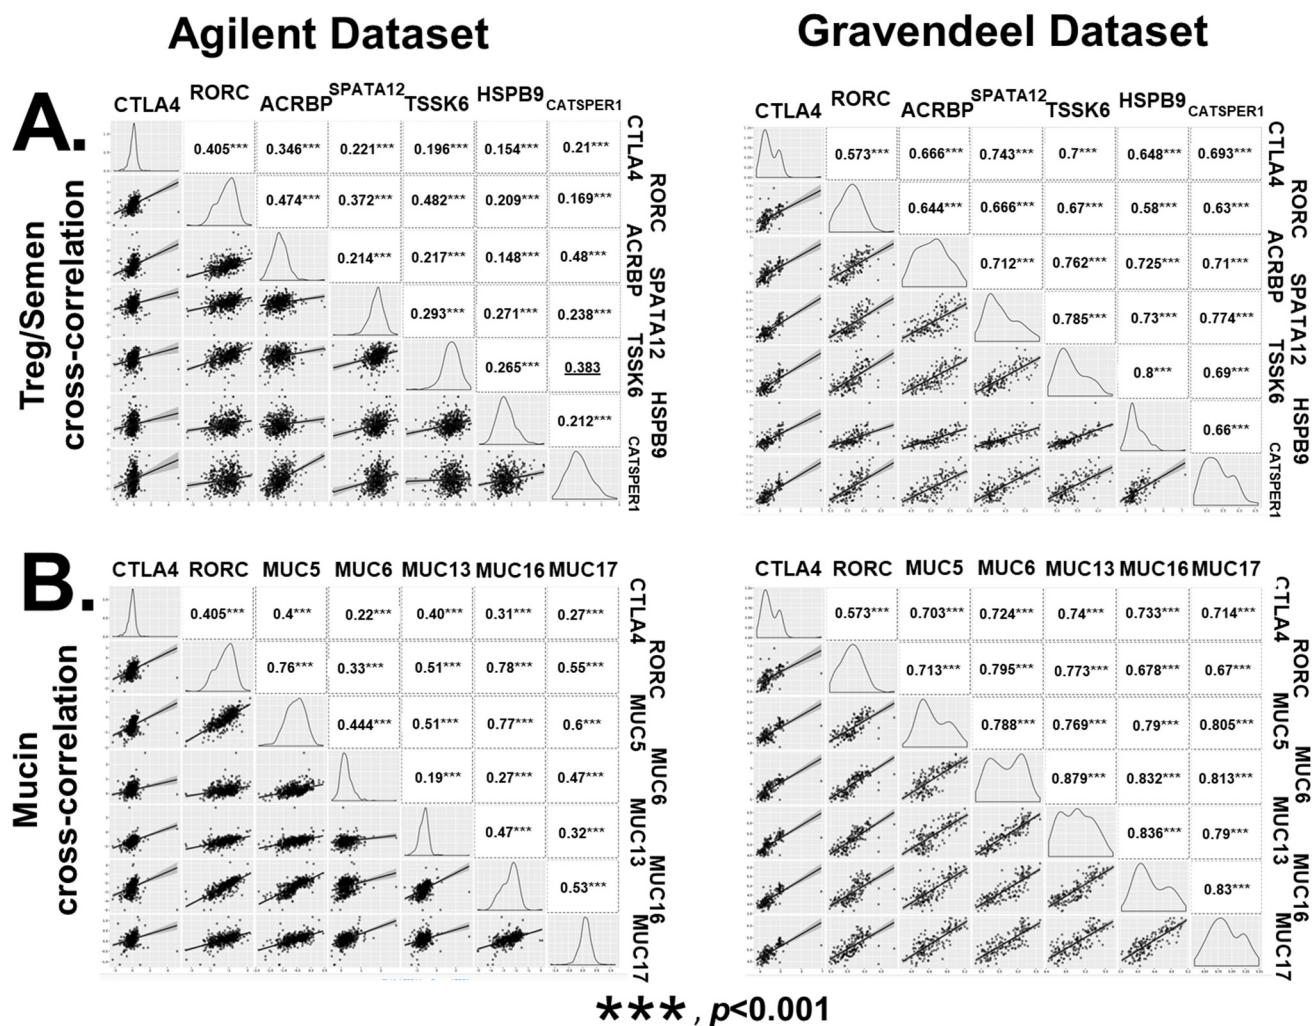

**Figure S2. Cross-correlation of CTLA4 and RORC with male-specific and mucin genes in GBM:** In Fig S2A the cross-correlations of *CTLA4* and *RORC* with the sperm specific genes *ACRBP*, *SPATA12*, *TSSK6*, *HSPB9*, and *CATSPER1*. In Fig S2B the cross-correlations of *CTLA4* and *RORC* with the mucin genes *MUC5B*, *MUC6*, *MUC13*, *MUC16* and *MUC17* are shown. These genes are native to both testicle and semen, both known to be rich with RORC-Tregs. The highly significant cross-correlations with *CTLA4* and *RORC* would suggest this RORC-Treg subtype is reconstituted in GBM. Transcription levels of wild-type IDH GBM tumors, drawn from Agilent, on the left, and Gravendeel, on the right, databases.  $p < 0.001$  in all cases. Images generated using Gliovis.

## U133 Dataset

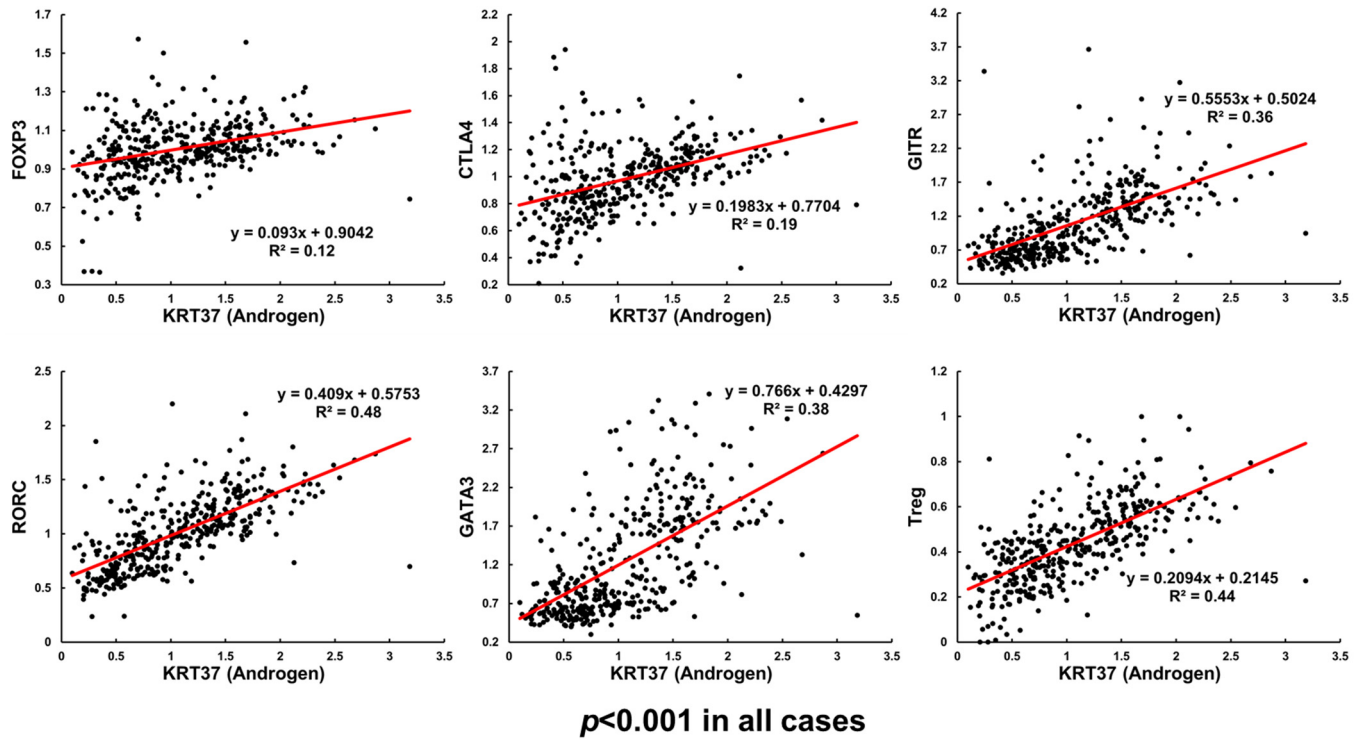

Figure S3. Cross-correlation of RORC-Treg genes with androgen report gene *KRT37*, in GBM: The cross-correlations of individual RORC-Treg markers and Tregs with androgen responsive gene *KRT37*. GBM tumors, wild-type IDH, were drawn from the U133 Firehose Legacy database; correlations are  $p < 0.001$  in all cases.

## U133 Dataset

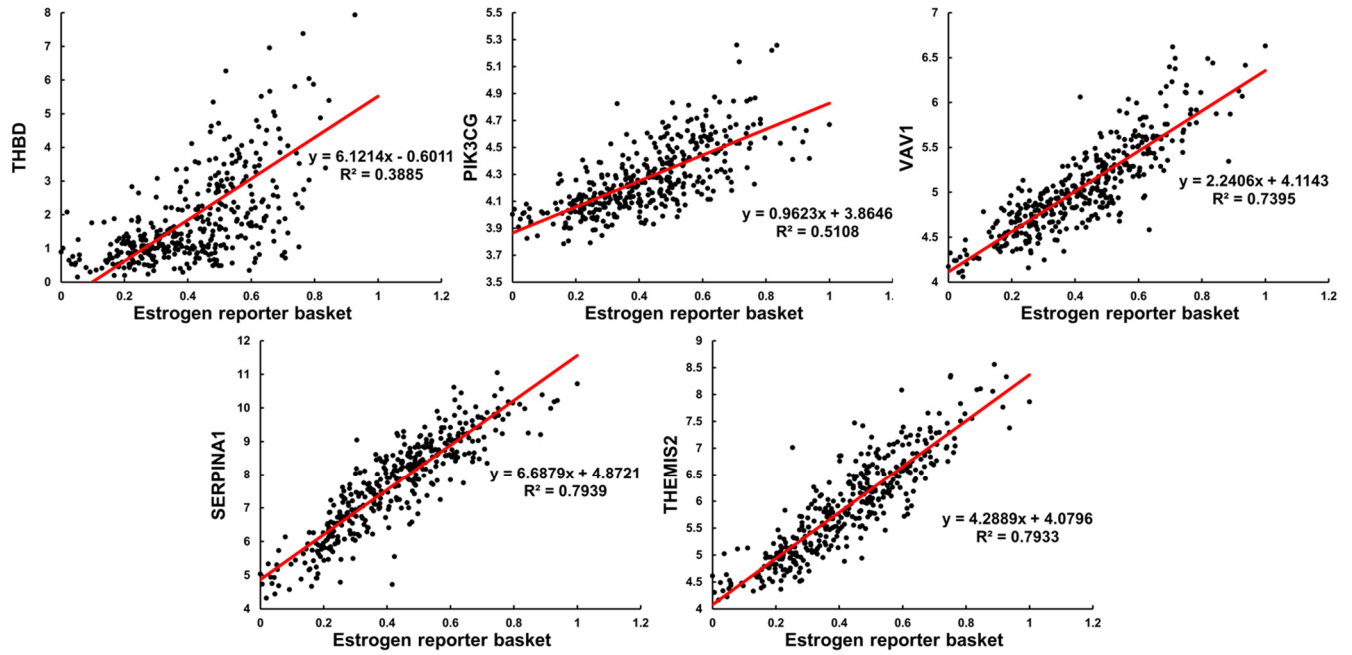

**$p < 0.001$  in all cases**

**Figure S4. Cross-correlation of estrogen sensitive genes in GBM:** The cross-correlations of GBM tumor mRNA levels of estrogen gene proxies with the calculated 'Estrogen reporter basket': derived by the averaged/normalized levels of the five estrogen reporter genes. Data for GBM transcriptome, wild-type IDH, were drawn from the U133 Firehose Legacy database and correlations are  $p < 0.001$  in all cases.

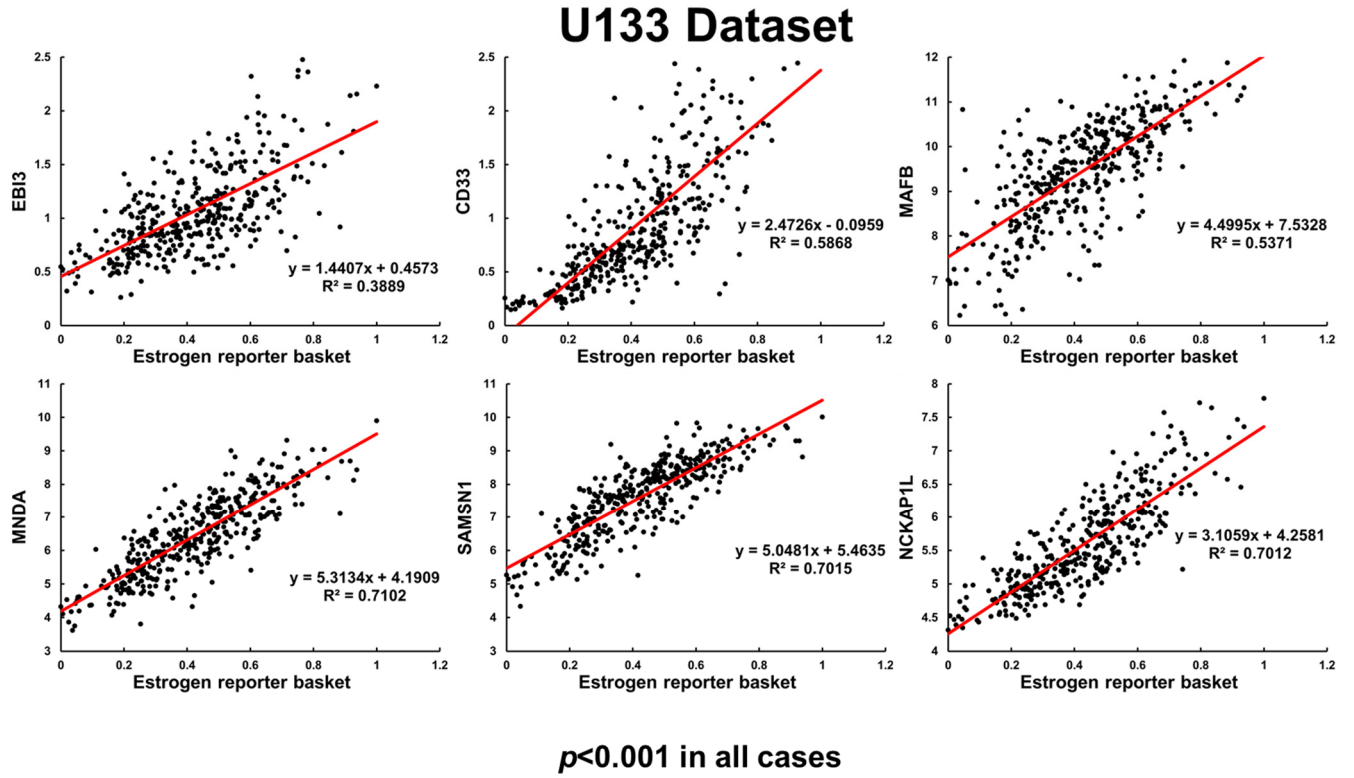

**Figure S5. Cross-correlation of MDSC/TAM markers and estrogen reporter basket in GBM:** The cross-correlations of MDSC and TAM gene markers with synthetic 'Estrogen' series derived from the averaged rescaled mRNA levels of estrogen responsive genes. GBM tumors, wild-type IDH, were drawn from the U133 Firehose Legacy database and correlations are  $p < 0.001$  in all cases. MDSC= myeloid derived suppressor cell; TAM= tumor associated macrophage.



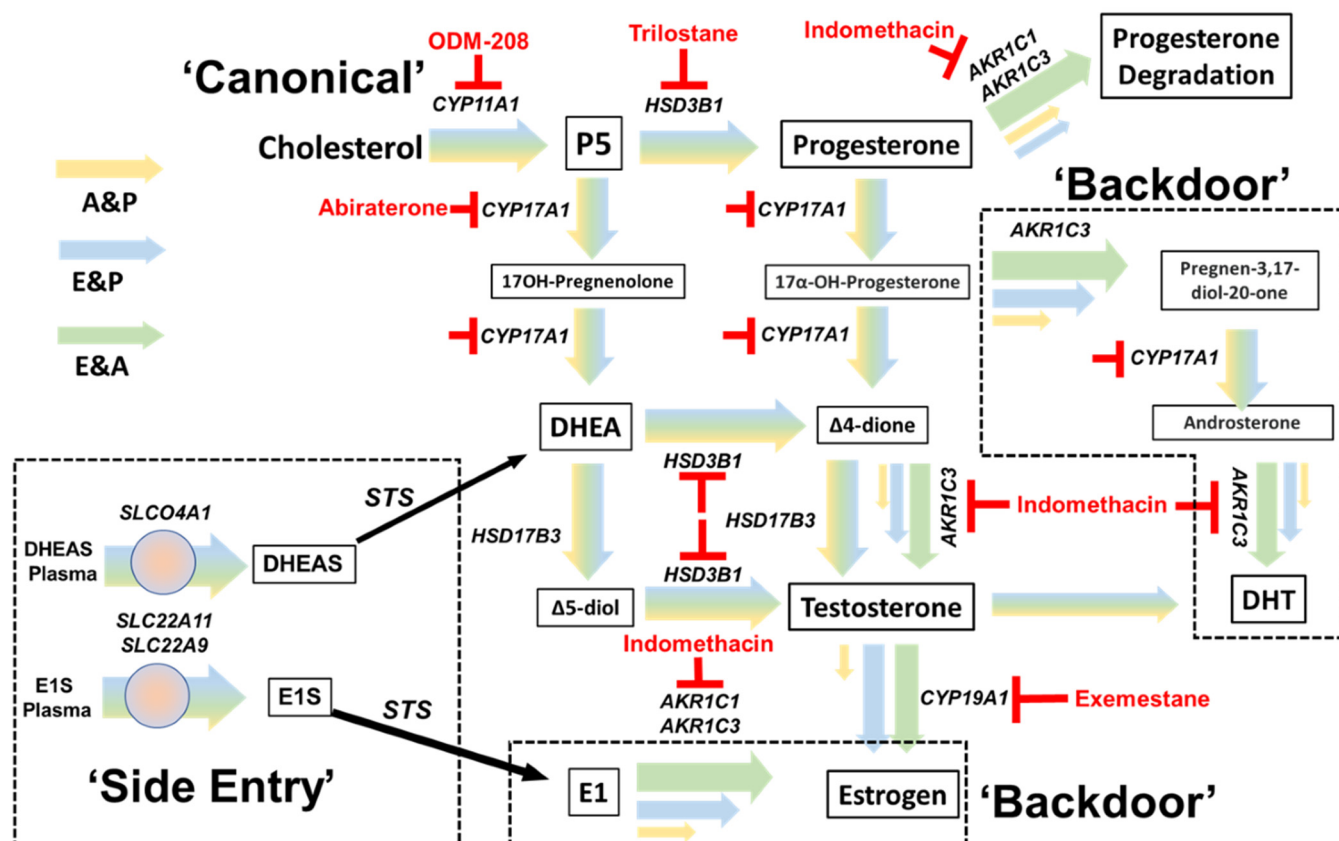

**Figure S6. Steroid Synthesis Pathway with Enzyme Inhibitors:** Depiction of classical, backdoor and side entry steroid synthesis pathways with inhibitors in red. Yellow denotes high androgen/progesterone; low estrogen (A&P), blue denotes high estrogen/progesterone; low androgen (E&P), and green denotes high estrogen/androgen; low progesterone (E&A). Arrow size correlates directly with level of upregulation. Tricoloured arrows designate equal upregulation among all three groups. **Canonical:** Cholesterol converts to P5 via CYP11A1, inhibitable by ODM-208. CYP17A1 converts P5 to 17OH-pregnenolone and then into DHEA, blockable by abiraterone. DHEA then converts into  $\Delta^5$ -diol by AKR1C3 or HSD17B3, and further converted to testosterone via HSD3B1, inhibitable by trilostane. DHEA can also be converted to  $\Delta^4$ -dione via HSD3B1, further converted to testosterone by AKR1C3 or HSD17B3, and proceeds to DHT via SRD5A or AKR1C3. **Side entry/Backdoor:** GBMs also use the fetal androgen synthesis pathway. The 'side entry' pathway starts with DHEAS and E1S with SLCO4A1, SLC22A11, SLC22A9 and STS, used to convert DHEAS to DHEA to  $\Delta^4$ -dione to testosterone, estrogen and DHT. The backdoor pathway starts with a diversion of the 17- $\alpha$ -OH-progesterone into pregnen-3,17-diol-20-one via AKR1C3. CYP17A1 generates androsterone which is converted into DHT by AKR1C3, bypassing the canonical testosterone route. This also converts estradiol to estrone via aldo-keto reductases 1 and 3, both inhibitable by indomethacin.

## Gall Bladder Surgery Control Serum

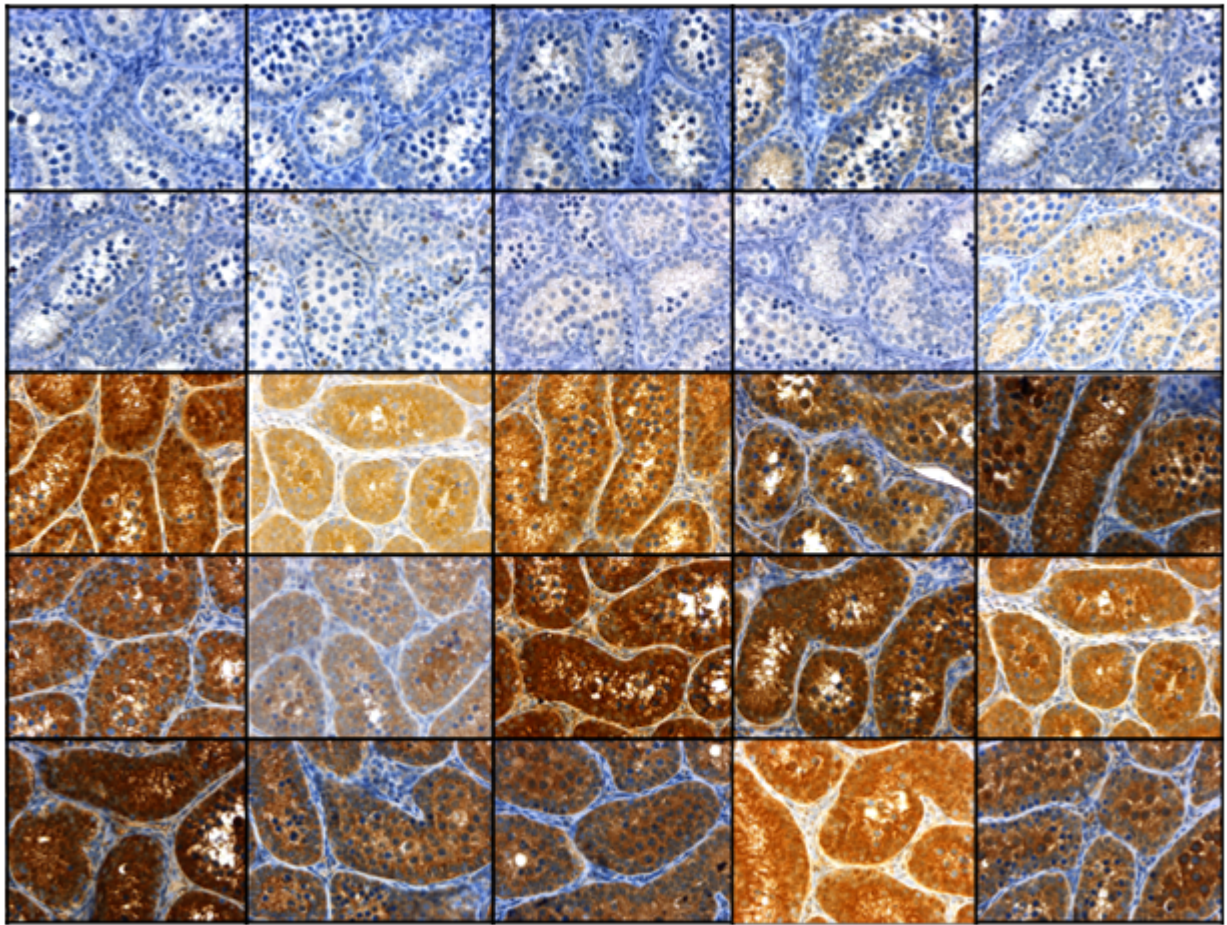

## GBM Surgery Serum

**Figure S7. Monkey Testicle labeled with GBM and Control Patient Serum:** Patients serum anti-testicular antibodies assayed using fixed cynomolgus monkey testicle slices. Top two rows consist of serum from control patients, showing low levels of anti-sperm/testicular antibodies, less brown staining. The next three rows are GBM patient serum, showing evidence of antibodies to testicular germ cells, seen deeply stained (brown).

**Table S1.** Characteristics of stratification of GBM tumors by HiF and Treg fractionation, we  $p$ -values derived from t-tests performed against the neither cohort.

| U133 Dataset |       | Normalized enrichment of gene or gene basket             |        |       |       |       |       |       |       |       |       |       |       |       |           |            |
|--------------|-------|----------------------------------------------------------|--------|-------|-------|-------|-------|-------|-------|-------|-------|-------|-------|-------|-----------|------------|
| Cohort       | Pop % | SLC2A1                                                   | SLC2A3 | VEGFA | VLDLR | ADM   | HiF   | FOXP3 | CTLA4 | GITR  | RORC  | GATA3 | Treg  | MG    | MG Inflam | MG ↑↑NF-kB |
| A-Treg       | 28.5  | 1.21                                                     | 1.77   | 0.85  | 1.07  | 1.10  | 1.08  | 1.17  | 1.35  | 2.70  | 1.82  | 3.32  | 2.08  | 0.69  | 1.66      | 0.86       |
| B-Treg&HiF   | 21.6  | 1.91                                                     | 2.91   | 2.80  | 1.78  | 1.48  | 2.20  | 1.12  | 1.34  | 2.67  | 1.69  | 2.77  | 1.90  | 0.84  | 1.81      | 2.03       |
| C-HiF        | 23.9  | 1.70                                                     | 2.24   | 2.91  | 2.09  | 1.39  | 2.09  | 1.00  | 0.97  | 0.93  | 0.96  | 0.95  | 0.98  | 1.12  | 1.21      | 1.16       |
| D-Neither    | 26.0  | 1.0                                                      | 1.0    | 1.0   | 1.0   | 1.0   | 1.0   | 1.0   | 1.0   | 1.0   | 1.0   | 1.0   | 1.0   | 1.0   | 1.0       | 1.0        |
| Cohort       |       | $p$ =value of stratified group with respect to 'neither' |        |       |       |       |       |       |       |       |       |       |       |       |           |            |
| A-Treg       |       | >0.05                                                    | 2E-04  | >0.05 | >0.05 | >0.05 | >0.05 | 5E-06 | 6E-14 | 5E-18 | 3E-19 | 1E-12 | 9E-21 | 1E-06 | 9E-04     | >0.05      |
| B-Treg&HiF   |       | 3E-14                                                    | 4E-15  | 3E-06 | 3E-06 | 1E-14 | 2E-20 | 1E-02 | >0.05 | 3E-14 | 3E-16 | 2E-08 | 3E-15 | 2E-04 | 4E-05     | 4E-07      |
| C-HiF        |       | 8E-11                                                    | 2E-10  | 4E-07 | 3E-08 | 1E-08 | 7E-15 | >0.05 | >0.05 | >0.05 | >0.05 | >0.05 | >0.05 | >0.05 | >0.05     | >0.05      |

  

| Agilent Dataset |       | Normalized enrichment of gene or gene basket             |        |       |       |       |       |       |       |       |       |       |       |       |           |            |
|-----------------|-------|----------------------------------------------------------|--------|-------|-------|-------|-------|-------|-------|-------|-------|-------|-------|-------|-----------|------------|
| Cohort          | Pop % | SLC2A1                                                   | SLC2A3 | VEGFA | VLDLR | ADM   | HiF   | FOXP3 | CTLA4 | GITR  | RORC  | GATA3 | Treg  | MG    | MG Inflam | MG ↑↑NF-kB |
| A-Treg          | 24.9  | 1.17                                                     | 0.93   | 0.71  | 1.12  | 0.61  | 0.80  | 1.12  | 1.10  | 1.35  | 1.17  | 1.23  | 1.76  | 0.82  | 1.17      | 0.90       |
| B-Treg&HiF      | 26.9  | 1.81                                                     | 2.19   | 2.56  | 2.21  | 3.11  | 2.80  | 1.10  | 1.04  | 1.29  | 1.15  | 1.19  | 1.72  | 0.87  | 1.13      | 1.62       |
| C-HiF           | 21.9  | 1.77                                                     | 1.96   | 3.50  | 2.14  | 3.06  | 3.05  | 1.01  | 0.96  | 1.12  | 1.01  | 1.04  | 1.07  | 0.80  | 1.11      | 1.24       |
| D-Neither       | 26.4  | 1.0                                                      | 1.0    | 1.0   | 1.0   | 1.0   | 1.0   | 1.0   | 1.0   | 1.0   | 1.0   | 1.0   | 1.0   | 1.0   | 1.0       | 1.0        |
| Cohort          |       | $p$ =value of stratified group with respect to 'neither' |        |       |       |       |       |       |       |       |       |       |       |       |           |            |
| A-Treg          |       | >0.05                                                    | >0.05  | >0.05 | >0.05 | >0.05 | >0.05 | 1E-09 | 5E-04 | 6E-07 | 5E-08 | 1E-07 | 4E-10 | >0.05 | >0.05     | >0.05      |
| B-Treg&HiF      |       | 3E-06                                                    | 9E-06  | 1E-03 | 3E-03 | 3E-04 | 8E-07 | 8E-06 | 3E-02 | 1E-08 | 6E-09 | 1E-07 | 1E-11 | >0.05 | >0.05     | >0.05      |
| C-HiF           |       | 3E-05                                                    | 3E-05  | 4E-05 | 4E-02 | 1E-03 | 1E-06 | >0.05 | >0.05 | >0.05 | >0.05 | >0.05 | >0.05 | 1E-02 | >0.05     | >0.05      |



| Gravendeel Dataset |       | Normalized enrichment of gene or gene basket                  |        |       |       |       |       |       |       |       |       |       |       |       |           |            |
|--------------------|-------|---------------------------------------------------------------|--------|-------|-------|-------|-------|-------|-------|-------|-------|-------|-------|-------|-----------|------------|
| Cohort             | Pop % | SLC2A1                                                        | SLC2A3 | VEGFA | VLDLR | ADM   | HiF   | FOXP3 | CTLA4 | GITR  | RORC  | GATA3 | Treg  | MG    | MG Inflam | MG ↑↑NF-kB |
| A-Treg             | 23.0  | 1.03                                                          | 0.97   | 1.01  | 1.05  | 0.96  | 1.09  | 1.12  | 1.07  | 1.07  | 1.07  | 1.05  | 2.72  | 0.99  | 1.02      | 1.02       |
| B-Treg&HiF         | 32.8  | 1.21                                                          | 1.19   | 1.30  | 1.16  | 1.20  | 2.13  | 1.16  | 1.17  | 1.13  | 1.08  | 1.18  | 4.34  | 1.03  | 1.05      | 1.03       |
| C-HiF              | 23.8  | 1.14                                                          | 1.16   | 1.25  | 1.10  | 1.23  | 1.95  | 1.03  | 1.01  | 0.99  | 1.00  | 0.99  | 1.10  | 0.94  | 1.03      | 1.06       |
| D-Neither          | 20.5  | 1.0                                                           | 1.0    | 1.0   | 1.0   | 1.0   | 1.0   | 1.0   | 1.0   | 1.0   | 1.0   | 1.0   | 1.0   | 1.0   | 1.0       | 1.0        |
| Cohort             |       | <i>p</i> =value of stratified group with respect to 'neither' |        |       |       |       |       |       |       |       |       |       |       |       |           |            |
| A-Treg             |       | >0.05                                                         | >0.05  | >0.05 | >0.05 | >0.05 | >0.05 | 8E-09 | 3E-04 | 2E-08 | 3E-07 | 1E-04 | 6E-08 | >0.05 | >0.05     | >0.05      |
| B-Treg&HiF         |       | 1E-14                                                         | 3E-07  | 2E-11 | 5E-04 | 3E-11 | 2E-13 | 5E-15 | 8E-12 | 2E-11 | 6E-12 | 4E-07 | 1E-13 | >0.05 | >0.05     | >0.05      |
| C-HiF              |       | 2E-11                                                         | 8E-07  | 3E-09 | 3E-02 | 3E-10 | 4E-11 | 5E-02 | >0.05 | >0.05 | >0.05 | 7E-03 | >0.05 | >0.05 | >0.05     | >0.05      |

  

| CGGA Dataset |       | Normalized enrichment of gene or gene basket                  |        |       |       |       |       |       |       |       |       |       |       |       |           |            |
|--------------|-------|---------------------------------------------------------------|--------|-------|-------|-------|-------|-------|-------|-------|-------|-------|-------|-------|-----------|------------|
| Cohort       | Pop % | SLC2A1                                                        | SLC2A3 | VEGFA | VLDLR | ADM   | HiF   | FOXP3 | CTLA4 | GITR  | RORC  | GATA3 | Treg  | MG    | MG Inflam | MG ↑↑NF-kB |
| A-Treg       | 24.1  | 1.38                                                          | 0.98   | 2.59  | 1.10  | 2.24  | 1.35  | 1.30  | 1.48  | 1.99  | 1.07  | 1.45  | 1.48  | 1.15  | 1.35      | 1.35       |
| B-Treg&HiF   | 33.2  | 2.55                                                          | 2.30   | 12.00 | 2.10  | 6.23  | 3.30  | 1.29  | 1.53  | 1.69  | 1.14  | 1.72  | 1.60  | 1.40  | 1.41      | 2.80       |
| C-HiF        | 14.4  | 2.23                                                          | 2.11   | 10.38 | 1.35  | 6.30  | 3.01  | 0.97  | 0.96  | 0.74  | 0.91  | 1.01  | 1.06  | 0.71  | 1.28      | 1.18       |
| D-Neither    | 28.3  | 1.0                                                           | 1.0    | 1.0   | 1.0   | 1.0   | 1.0   | 1.0   | 1.0   | 1.0   | 1.0   | 1.0   | 1.0   | 1.0   | 1.0       | 1.0        |
| Cohort       |       | <i>p</i> =value of stratified group with respect to 'neither' |        |       |       |       |       |       |       |       |       |       |       |       |           |            |
| A-Treg       |       | >0.05                                                         | >0.05  | 8E-04 | >0.05 | 1E-05 | 1E-03 | >0.05 | 2E-02 | >0.05 | >0.05 | 2E-02 | >0.05 | >0.05 | >0.05     | >0.05      |
| B-Treg&HiF   |       | 2E-06                                                         | 6E-05  | 7E-11 | 5E-04 | 1E-09 | 1E-13 | >0.05 | 4E-02 | >0.05 | >0.05 | 7E-03 | >0.05 | >0.05 | 3E-03     | 3E-04      |
| C-HiF        |       | 6E-05                                                         | 2E-03  | 6E-07 | >0.05 | 8E-10 | 2E-12 | >0.05 | 5E-02 | >0.05 | >0.05 | >0.05 | >0.05 | >0.05 | 7E-03     | >0.05      |

Table S2. Characteristics of stratification of GBM tumors by steroidogenic fractionation, we *p*-values derived from t-tests performed against the steroidogenic cohort.

| U133 Dataset |                                                                                                 | Normalized enrichment of gene or gene basket |         |         |         |         |         |         |        |        |        |     |           |            |          |          |      |      |      |      |
|--------------|-------------------------------------------------------------------------------------------------|----------------------------------------------|---------|---------|---------|---------|---------|---------|--------|--------|--------|-----|-----------|------------|----------|----------|------|------|------|------|
| Cohort       | Pop %                                                                                           | SLC22A11                                     | SLC22A9 | SLCO4A1 | CYP11A1 | CYP17A1 | CYP19A1 | HSD17B3 | HSD3B1 | AKR1C1 | AKR1C3 | MG  | MG Inflam | MG ↑↑NF-kB | Androgen | Estrogen | CD33 | IL10 | EBI3 | MNDA |
| A-T&P, low E | 28.5                                                                                            | 1.17                                         | 1.70    | 1.47    | 1.90    | 1.35    | 0.94    | 0.85    | 1.30   | 1.37   | 0.80   | 0.6 | 1.4       | 0.7        | 2.3      | 0.9      | 0.77 | 0.78 | 0.92 | 0.77 |
| B-E&P, low A | 25.4                                                                                            | 1.10                                         | 1.57    | 1.48    | 1.83    | 1.19    | 2.01    | 0.84    | 1.19   | 1.29   | 1.13   | 1.1 | 1.4       | 1.2        | 1.7      | 1.8      | 1.65 | 1.41 | 1.24 | 1.28 |
| C-E&A, low P | 21.6                                                                                            | 1.16                                         | 1.73    | 1.42    | 2.20    | 1.35    | 1.40    | 0.79    | 1.20   | 2.88   | 2.94   | 1.0 | 1.4       | 1.5        | 2.2      | 1.5      | 1.59 | 1.24 | 1.44 | 1.25 |
| D-Asteroid   | 24.4                                                                                            | 1.0                                          | 1.0     | 1.0     | 1.0     | 1.0     | 1.0     | 1.0     | 1.0    | 1.0    | 1.0    | 1.0 | 1.0       | 1.0        | 1.0      | 1.0      | 1.0  | 1.0  | 1.0  | 1.0  |
| Cohort       | <i>p</i> =value of stratified group with respect to asteroidogenic tumor cohort                 |                                              |         |         |         |         |         |         |        |        |        |     |           |            |          |          |      |      |      |      |
| A-T&P, low E | 3E-042E-06>0.059E-031E-06>0.05>0.051E-041E-035E-05>0.05>0.055E-026E-102E-069E-04>0.051E-022E-02 |                                              |         |         |         |         |         |         |        |        |        |     |           |            |          |          |      |      |      |      |
| B-E&P, low A | >0.054E-02>0.055E-03>0.052E-07>0.053E-026E-041E-053E-046E-019E-052E-021E-141E-113E-041E-062E-09 |                                              |         |         |         |         |         |         |        |        |        |     |           |            |          |          |      |      |      |      |
| C-E&A, low P | 5E-031E-05>0.053E-048E-053E-09>0.051E-03>0.05>0.057E-041E-027E-072E-072E-226E-188E-047E-092E-14 |                                              |         |         |         |         |         |         |        |        |        |     |           |            |          |          |      |      |      |      |

| Agilent Dataset |       | Normalized enrichment of gene or gene basket                            |         |         |         |         |         |         |        |        |        |       |            |            |          |          |       |       |       |       |
|-----------------|-------|-------------------------------------------------------------------------|---------|---------|---------|---------|---------|---------|--------|--------|--------|-------|------------|------------|----------|----------|-------|-------|-------|-------|
| Cohort          | Pop % | SLC22A11                                                                | SLC22A9 | SLCO4A1 | CYP11A1 | CYP17A1 | CYP19A1 | HSD17B3 | HSD3B1 | AKR1C1 | AKR1C3 | MG    | MG Inflamm | MG ↑↑NF-κB | Androgen | Estrogen | CD33  | IL10  | EBI3  | MNDA  |
| A-T&P, low E    | 28.9  | 1.08                                                                    | 1.00    | 1.05    | 1.18    | 1.06    | 1.15    | 1.04    | 1.01   | 1.28   | 1.43   | 0.94  | 0.99       | 0.98       | 1.50     | 1.16     | 1.50  | 1.11  | 1.10  | 2.14  |
| B-E&P, low A    | 25.4  | 1.04                                                                    | 0.86    | 1.07    | 1.12    | 1.02    | 1.39    | 1.23    | 1.01   | 1.17   | 1.75   | 1.21  | 0.92       | 1.07       | 1.00     | 1.53     | 1.43  | 1.20  | 1.02  | 1.86  |
| C-E&A, low P    | 26.4  | 1.08                                                                    | 0.71    | 1.01    | 1.17    | 1.08    | 1.77    | 1.10    | 1.03   | 1.48   | 2.17   | 1.23  | 1.08       | 1.39       | 1.58     | 1.91     | 1.36  | 1.17  | 1.07  | 1.92  |
| D-Asteroid      | 19.4  | 1.0                                                                     | 1.0     | 1.0     | 1.0     | 1.0     | 1.0     | 1.0     | 1.0    | 1.0    | 1.0    | 1.0   | 1.0        | 1.0        | 1.0      | 1.0      | 1.0   | 1.0   | 1.0   | 1.0   |
| Cohort          |       | p=value of stratified group with respect to asteroidogenic tumor cohort |         |         |         |         |         |         |        |        |        |       |            |            |          |          |       |       |       |       |
| A-T&P, low E    |       | 1E-03                                                                   | >0.05   | >0.05   | 2E-02   | 9E-04   | >0.05   | >0.05   | >0.05  | >0.05  | >0.05  | >0.05 | >0.05      | >0.05      | 2E-12    | >0.05    | >0.05 | >0.05 | >0.05 | >0.05 |
| B-E&P, low A    |       | >0.05                                                                   | >0.05   | >0.05   | 4E-02   | >0.05   | >0.05   | 6E-03   | >0.05  | >0.05  | >0.05  | >0.05 | >0.05      | >0.05      | >0.05    | >0.05    | >0.05 | >0.05 | >0.05 | >0.05 |
| C-E&A, low P    |       | 4E-02                                                                   | 1E-03   | >0.05   | >0.05   | 3E-02   | >0.05   | >0.05   | 2E-02  | >0.05  | >0.05  | 7E-03 | >0.05      | >0.05      | 5E-05    | 1E-02    | 5E-02 | >0.05 | 2E-02 | >0.05 |

| Gravendeel Dataset |       | Normalized enrichment of gene or gene basket |         |         |         |         |         |         |        |        |        |    |            |            |          |          |      |      |      |      |
|--------------------|-------|----------------------------------------------|---------|---------|---------|---------|---------|---------|--------|--------|--------|----|------------|------------|----------|----------|------|------|------|------|
| Cohort             | Pop % | SLC22A11                                     | SLC22A9 | SLCO4A1 | CYP11A1 | CYP17A1 | CYP19A1 | HSD17B3 | HSD3B1 | AKR1C1 | AKR1C3 | MG | MG Inflamm | MG ↑↑NF-kB | Androgen | Estrogen | CD33 | IL10 | EBI3 | MNDA |

|              |      |                                                                                 |       |       |       |       |       |       |       |       |       |       |       |       |       |       |       |       |       |       |
|--------------|------|---------------------------------------------------------------------------------|-------|-------|-------|-------|-------|-------|-------|-------|-------|-------|-------|-------|-------|-------|-------|-------|-------|-------|
| A-T&P, low E | 26.2 | 1.07                                                                            | 1.11  | 1.03  | 1.03  | 1.05  | 1.08  | 1.06  | 1.06  | 1.02  | 1.01  | 1.06  | 0.96  | 1.03  | 2.09  | 1.12  | 1.01  | 1.01  | 1.03  | 1.00  |
| B-E&P, low A | 21.3 | 1.04                                                                            | 1.06  | 1.03  | 1.03  | 1.02  | 1.04  | 1.02  | 1.03  | 1.01  | 1.01  | 1.04  | 0.95  | 1.05  | 1.13  | 2.06  | 1.16  | 1.06  | 1.10  | 1.21  |
| C-E&A, low P | 26.2 | 1.23                                                                            | 1.23  | 1.13  | 1.21  | 1.18  | 1.22  | 1.17  | 1.22  | 1.14  | 0.99  | 1.09  | 0.96  | 1.01  | 3.26  | 2.34  | 1.20  | 1.14  | 1.16  | 1.21  |
| D-Asteroid   | 26.2 | 1.0                                                                             | 1.0   | 1.0   | 1.0   | 1.0   | 1.0   | 1.0   | 1.0   | 1.0   | 1.0   | 1.0   | 1.0   | 1.0   | 1.0   | 1.0   | 1.0   | 1.0   | 1.0   | 1.0   |
| Cohort       |      | <i>p</i> =value of stratified group with respect to asteroidogenic tumor cohort |       |       |       |       |       |       |       |       |       |       |       |       |       |       |       |       |       |       |
| A-T&P, low E |      | 7E-04                                                                           | 2E-07 | >0.05 | >0.05 | 3E-04 | 3E-06 | 7E-02 | 1E-05 | >0.05 | >0.05 | >0.05 | >0.05 | >0.05 | 4E-15 | 3E-06 | >0.05 | 1E-02 | >0.05 | >0.05 |
| B-E&P, low A |      | >0.05                                                                           | 2E-02 | >0.05 | >0.05 | >0.05 | 6E-03 | >0.05 | >0.05 | >0.05 | >0.05 | >0.05 | >0.05 | >0.05 | >0.05 | 6E-03 | 3E-12 | 1E-04 | 2E-04 | 5E-12 |
| C-E&A, low P |      | 5E-20                                                                           | 4E-14 | 9E-08 | 1E-04 | 2E-24 | 1E-24 | 9E-06 | 5E-30 | 9E-15 | >0.05 | 2E-02 | >0.05 | >0.05 | 3E-27 | 1E-24 | 5E-12 | 3E-10 | 3E-08 | 1E-10 |

| CGGA Dataset |       | Normalized enrichment of gene or gene basket                            |         |         |         |         |         |         |        |        |        |       |           |            |          |          |       |       |       |       |
|--------------|-------|-------------------------------------------------------------------------|---------|---------|---------|---------|---------|---------|--------|--------|--------|-------|-----------|------------|----------|----------|-------|-------|-------|-------|
| Cohort       | Pop % | SLC22A11                                                                | SLC22A9 | SLCO4A1 | CYP11A1 | CYP17A1 | CYP19A1 | HSD17B3 | HSD3B1 | AKR1C1 | AKR1C3 | MG    | MG Inflam | MG ↑↑NF-kB | Androgen | Estrogen | CD33  | IL10  | EBI3  | MNDA  |
| A-T&P, low E | 23.5  | 1.05                                                                    |         | 1.76    | 1.33    | 1.19    | 1.20    | 4.80    |        | 2.11   | 3.50   | 1.94  | 0.93      | 0.48       |          | 1.18     | 1.71  | 3.12  | 1.04  | 1.91  |
| B-E&P, low A | 25.1  | 1.13                                                                    |         | 2.81    | 1.76    | 1.07    | 3.67    | 4.60    |        | 1.96   | 4.51   | 2.91  | 1.06      | 1.39       |          | 3.13     | 3.36  | 4.25  | 1.71  | 4.39  |
| C-E&A, low P | 26.2  | 1.19                                                                    |         | 2.50    | 2.67    | 1.15    | 2.48    | 3.41    |        | 5.19   | 7.32   | 3.55  | 0.99      | 1.59       |          | 4.01     | 3.49  | 5.17  | 2.16  | 5.55  |
| D-Asteroid   | 25.1  | 1.0                                                                     |         | 1.0     | 1.0     | 1.0     | 1.0     | 1.0     |        | 1.0    | 1.0    | 1.0   | 1.0       | 1.0        |          | 1.0      | 1.0   | 1.0   | 1.0   | 1.0   |
| Cohort       |       | p=value of stratified group with respect to asteroidogenic tumor cohort |         |         |         |         |         |         |        |        |        |       |           |            |          |          |       |       |       |       |
| A-T&P, low E |       | >0.05                                                                   |         | 4E-02   | 1E-03   | >0.05   | >0.05   | 6E-07   |        | >0.05  | 2E-02  | 3E-02 | >0.05     | 1E-02      |          | 3E-02    | >0.05 | 1E-02 | >0.05 | >0.05 |
| B-E&P, low A |       | 1E-02                                                                   |         | 2E-04   | 1E-03   | >0.05   | 6E-11   | 6E-04   |        | >0.05  | 9E-03  | 5E-05 | >0.05     | >0.05      |          | 5E-05    | 6E-05 | 3E-04 | >0.05 | 3E-03 |
| C-E&A, low P |       | 3E-02                                                                   |         | 2E-04   | 4E-05   | >0.05   | 6E-05   | 3E-06   |        | 1E-04  | 1E-07  | 2E-08 | >0.05     | >0.05      |          | 2E-08    | 2E-05 | 2E-06 | 6E-02 | 1E-05 |
